# Supplementary material for: Predicting seasonal influenza transmission using functional regression models with temporal dependence
Source: PLOS journal article supplement (doi:10.1371/journal.pone.0194250), 2018-04-25
Supplement: S1 (10.1371/journal.pone.0194250.s001) [file journal.pone.0194250.s001]

## S1 Appendix: Supplemental information, source data and code

This document is an extension of a chapter of a book derived from a congress (IWFOs 2014, Stresa, Italy) [1]. In addition, this work includes new sections that enhancing the simulation study and incorporating a nice application to flu epidemics.

All functions needed for the simulation studies are included in version 1.4 of the `fda.usc` package [2] of software R. The function `fregre.gls` (and `predict.fregre.gls`) estimates (and predicts) the functional regression model with correlated errors, function `fregre.igls` is an iterative version of the previous one, function `dcor.fdist` computes the distance correlation between multivariate and functional objects and function `GCCV.S` computes the GCCV criterion.

**Supplemental Code and Data.zip:** Zip compressed file containing the code for numerical studies (`PLOSimulation_AR1.R`, `PLOSimulation_AR2.R`), the real dataset (`influenza.rda`) and the code for generating the plots and tables in the flu prediction example (`influenza.R`).

## References

1. Febrero-Bande M, Oviedo de la Fuente M. Functional Regression Models with Temporal and/or Spatial Dependence. In *Contributions in infinite-dimensional statistics and related topics* pp:107–112. Società Editrice Esculapio, 2014.
2. Febrero-Bande M, Oviedo de la Fuente M. Statistical computing in functional data analysis: the R package `fda.usc`. *J Stat Softw.* 2012;51(4):1–28.
